# Supplementary material for: Novel organotin complexes derived from 2,2′-selenodiacetic acid: synthesis and biological evaluation
Source: Royal Society of Chemistry journal article supplement (doi:10.1039/c6ra01948j), 2016-01-01
Supplement: c6ra01948j1.pdf [file c6ra01948j1.pdf]

## Novel organotin complexes derive from 2, 2'-selenodiacetic acid: synthesis, and biological evaluation

Qianli Li<sup>a</sup>, Shuang Cheng<sup>b</sup>, Rufen Zhang,<sup>a</sup> Yang Shi,<sup>a</sup> and Chunlin Ma<sup>a\*</sup>,

<sup>a</sup> Department of Chemistry and Chemical Engineering, Liaocheng University, Liaocheng 252059,  
P. R. China

<sup>b</sup> Department of Agriculture, Liaocheng University, Liaocheng 252059, P. R. China

Table S1

Selected bond lengths (Å) and angles (°) for complex 1

|                   |           |                    |           |
|-------------------|-----------|--------------------|-----------|
| Sn(1)-C(6)        | 2.12(2)   | Sn(2)-C(8)         | 2.12(2)   |
| Sn(1)-C(5)        | 2.13(3)   | Sn(2)-C(10)        | 2.14(2)   |
| Sn(1)-C(7)        | 2.14(2)   | Sn(2)-O(2)#2       | 2.193(14) |
| Sn(1)-O(4)#1      | 2.181(14) | Sn(2)-O(3)         | 2.459(15) |
| Sn(1)-O(1)        | 2.414(14) | Se(1)-C(3)         | 1.93(2)   |
| Sn(2)-C(9)        | 2.10(3)   | Se(1)-C(1)         | 1.95(2)   |
| C(6)-Sn(1)-C(5)   | 120.3(13) | C(9)-Sn(2)-C(8)    | 125.7(10) |
| C(6)-Sn(1)-C(7)   | 119.5(12) | C(9)-Sn(2)-C(10)   | 115.3(11) |
| C(5)-Sn(1)-C(7)   | 119.3(14) | C(8)-Sn(2)-C(10)   | 118.5(11) |
| C(6)-Sn(1)-O(4)#1 | 94.2(8)   | C(9)-Sn(2)-O(2)#2  | 94.8(8)   |
| C(5)-Sn(1)-O(4)#1 | 98.1(10)  | C(8)-Sn(2)-O(2)#2  | 94.0(9)   |
| C(7)-Sn(1)-O(4)#1 | 87.3(9)   | C(10)-Sn(2)-O(2)#2 | 87.6(8)   |
| C(6)-Sn(1)-O(1)   | 89.3(8)   | C(9)-Sn(2)-O(3)    | 88.9(8)   |
| C(5)-Sn(1)-O(1)   | 87.9(10)  | C(8)-Sn(2)-O(3)    | 88.6(9)   |
| C(7)-Sn(1)-O(1)   | 83.1(9)   | C(10)-Sn(2)-O(3)   | 85.5(8)   |
| O(4)#1-Sn(1)-O(1) | 170.3(6)  | O(2)#2-Sn(2)-O(3)  | 173.1(5)  |

#1 x,y+1,z    #2 x+1,y,z

Table S2

Selected bond lengths (Å) and angles (°) for complex 2

|            |          |              |          |
|------------|----------|--------------|----------|
| Sn(1)-O(5) | 2.022(3) | Sn(2)-O(5)   | 2.048(3) |
| Sn(1)-C(4) | 2.094(5) | Sn(2)-C(7)   | 2.094(5) |
| Sn(1)-C(3) | 2.102(6) | Sn(2)-C(6)   | 2.103(5) |
| Sn(1)-O(1) | 2.178(3) | Sn(2)-O(5)#1 | 2.153(3) |
| Sn(1)-O(3) | 2.249(3) | Sn(2)-O(4)   | 2.274(3) |

Corresponding author: Fax: +86-635-8239040; Tel.: +86-635-8230660.  
E-mail address: macl856@163.com.

|                 |            |                   |            |
|-----------------|------------|-------------------|------------|
| O(5)-Sn(1)-C(4) | 112.53(18) | O(5)-Sn(2)-C(7)   | 106.94(16) |
| O(5)-Sn(1)-C(3) | 111.7(2)   | O(5)-Sn(2)-C(6)   | 103.67(17) |
| C(4)-Sn(1)-C(3) | 135.7(2)   | C(7)-Sn(2)-C(6)   | 147.9(2)   |
| O(5)-Sn(1)-O(1) | 77.95(11)  | O(5)-Sn(2)-O(5)#1 | 75.23(13)  |
| C(4)-Sn(1)-O(1) | 95.06(17)  | C(7)-Sn(2)-O(5)#1 | 96.58(16)  |
| C(3)-Sn(1)-O(1) | 96.4(2)    | C(6)-Sn(2)-O(5)#1 | 100.44(18) |
| O(5)-Sn(1)-O(3) | 91.67(12)  | O(5)-Sn(2)-O(4)   | 87.93(12)  |
| C(4)-Sn(1)-O(3) | 86.01(17)  | C(7)-Sn(2)-O(4)   | 82.65(17)  |
| C(3)-Sn(1)-O(3) | 90.2(2)    | C(6)-Sn(2)-O(4)   | 88.98(19)  |
| O(1)-Sn(1)-O(3) | 169.17(13) | O(5)#1-Sn(2)-O(4) | 162.19(13) |

#1 -x+1,-y+1,-z+2

Table S3

Selected bond lengths (Å) and angles (°) for complex **3**

|                   |           |                    |           |
|-------------------|-----------|--------------------|-----------|
| Sn(1)-C(9)        | 2.104(9)  | Sn(3)-C(29)        | 2.101(9)  |
| Sn(1)-C(5)        | 2.107(9)  | Sn(3)-C(33)        | 2.112(9)  |
| Sn(1)-C(1)        | 2.109(9)  | Sn(3)-O(4)         | 2.201(12) |
| Sn(1)-O(1)        | 2.203(12) | Sn(3)-O(7)         | 2.390(12) |
| Sn(2)-C(13)       | 2.103(9)  | Sn(4)-C(45)        | 2.077(9)  |
| Sn(2)-C(21)       | 2.114(9)  | Sn(4)-C(41)        | 2.082(9)  |
| Sn(2)-C(17)       | 2.115(9)  | Sn(4)-C(37)        | 2.115(9)  |
| Sn(2)-O(5)        | 2.158(12) | Sn(4)-O(8)#5       | 2.177(12) |
| Sn(2)-O(2)        | 2.426(11) | Sn(4)-O(6)         | 2.426(14) |
| Sn(3)-C(25)       | 2.096(9)  |                    |           |
| C(9)-Sn(1)-C(5)   | 114.4(7)  | C(25)-Sn(3)-C(29)  | 111.7(7)  |
| C(9)-Sn(1)-C(1)   | 116.5(6)  | C(25)-Sn(3)-C(33)  | 123.5(7)  |
| C(5)-Sn(1)-C(1)   | 127.7(7)  | C(29)-Sn(3)-C(33)  | 121.3(8)  |
| C(9)-Sn(1)-O(1)   | 97.1(5)   | C(25)-Sn(3)-O(4)   | 96.1(6)   |
| C(5)-Sn(1)-O(1)   | 90.1(6)   | C(29)-Sn(3)-O(4)   | 95.3(6)   |
| C(1)-Sn(1)-O(1)   | 94.9(6)   | C(33)-Sn(3)-O(4)   | 97.2(6)   |
| C(9)-Sn(1)-O(3)   | 81.2(5)   | C(25)-Sn(3)-O(7)   | 85.9(5)   |
| C(5)-Sn(1)-O(3)   | 86.5(6)   | C(29)-Sn(3)-O(7)   | 80.8(5)   |
| C(1)-Sn(1)-O(3)   | 89.9(6)   | C(33)-Sn(3)-O(7)   | 84.5(6)   |
| O(1)-Sn(1)-O(3)   | 175.2(4)  | O(4)-Sn(3)-O(7)    | 176.0(5)  |
| C(13)-Sn(2)-C(21) | 116.9(7)  | C(45)-Sn(4)-C(41)  | 127.4(8)  |
| C(13)-Sn(2)-C(17) | 126.4(7)  | C(45)-Sn(4)-C(37)  | 98.7(7)   |
| C(21)-Sn(2)-C(17) | 115.7(7)  | C(41)-Sn(4)-C(37)  | 130.9(8)  |
| C(13)-Sn(2)-O(5)  | 91.9(6)   | C(45)-Sn(4)-O(8)#5 | 106.0(7)  |
| C(21)-Sn(2)-O(5)  | 99.4(6)   | C(41)-Sn(4)-O(8)#5 | 91.7(7)   |
| C(17)-Sn(2)-O(5)  | 88.6(6)   | C(37)-Sn(4)-O(8)#5 | 90.5(7)   |
| C(13)-Sn(2)-O(2)  | 89.9(5)   | C(45)-Sn(4)-O(6)   | 76.3(6)   |
| C(21)-Sn(2)-O(2)  | 84.2(6)   | C(41)-Sn(4)-O(6)   | 93.3(6)   |
| C(17)-Sn(2)-O(2)  | 86.4(5)   | C(37)-Sn(4)-O(6)   | 81.0(7)   |
| O(5)-Sn(2)-O(2)   | 174.7(4)  | O(8)#5-Sn(4)-O(6)  | 171.4(5)  |

#5 x-1/2,y,-z+1/2

Table S4

Selected bond lengths (Å) and angles (°) for complex **4**

|                 |           |                   |           |
|-----------------|-----------|-------------------|-----------|
| Sn(1)-C(5)      | 2.155(19) | Sn(2)-C(16)       | 2.07(2)   |
| Sn(1)-O(1)      | 2.146(10) | Sn(2)-O(7)        | 2.085(13) |
| Sn(1)-O(5)      | 2.153(10) | Sn(2)-O(3)        | 2.136(12) |
| Sn(1)-C(9)      | 2.181(19) | Sn(2)-C(20)       | 2.15(2)   |
| Sn(1)-O(6)      | 2.504(11) | Sn(2)-O(8)        | 2.552(13) |
| Sn(1)-O(2)      | 2.541(10) |                   |           |
| C(5)-Sn(1)-O(1) | 102.8(6)  | C(9)-Sn(1)-O(2)   | 90.8(5)   |
| C(5)-Sn(1)-O(5) | 107.1(6)  | O(6)-Sn(1)-O(2)   | 170.9(4)  |
| O(1)-Sn(1)-O(5) | 79.6(4)   | C(16)-Sn(2)-O(7)  | 105.6(8)  |
| C(5)-Sn(1)-C(9) | 140.6(7)  | C(16)-Sn(2)-O(3)  | 108.5(7)  |
| O(1)-Sn(1)-C(9) | 108.0(6)  | O(7)-Sn(2)-O(3)   | 82.2(5)   |
| O(5)-Sn(1)-C(9) | 102.2(6)  | C(16)-Sn(2)-C(20) | 137.0(8)  |
| C(5)-Sn(1)-O(6) | 85.6(6)   | O(7)-Sn(2)-C(20)  | 100.3(7)  |
| O(1)-Sn(1)-O(6) | 131.9(4)  | O(3)-Sn(2)-C(20)  | 108.7(6)  |
| O(5)-Sn(1)-O(6) | 53.1(4)   | C(16)-Sn(2)-O(8)  | 81.2(8)   |
| C(9)-Sn(1)-O(6) | 91.6(6)   | O(7)-Sn(2)-O(8)   | 54.4(4)   |
| C(5)-Sn(1)-O(2) | 86.9(6)   | O(3)-Sn(2)-O(8)   | 136.2(5)  |
| O(1)-Sn(1)-O(2) | 55.2(4)   | C(20)-Sn(2)-O(8)  | 86.8(7)   |
| O(5)-Sn(1)-O(2) | 134.7(4)  |                   |           |
